# Supplementary material
Source: publisher figshare collection journal article supplement (https://karger.figshare.com/ndownloader/files/23984042)
Supplement: Supplementary file 1 [file 23984042]

**Supplementary 1** Search strategy used in each database searched.

**PUBMED**

1. Search ”Ischemic Preconditioning” [Mesh]

2. Search Preconditioning, Ischemic

3. Search Ischemic Pre-Conditioning

4. Search Ischemic Pre Conditioning

5. Search Pre-Conditioning, Ischemic

6. Search Remote Ischemic Preconditioning

7. Search Remote Preconditioning

8. Search ((((((#1) OR #2) OR #3) #4) OR #5) OR #6) OR #7

9. Search Contrast Induced Nephropathy

10. Search Contrast-induced Nephropathy

11. Search “Acute Kidney Injury” [Mesh]

12. Search Acute Kidney Injuries

13. Search Kidney Injuries, Acute

14. Search Kidney Injury, Acute

15. Search Acute Renal Injury

16. Search Acute Renal Injuries

17. Search Renal Injuries, Acute

18. Search Renal Injury, Acute

19. Search Renal Insufficiency, Acute

20. Search Acute Renal Insufficiencies

21. Search Renal Insufficiencies, Acute

22. Search Acute Renal Insufficiency

23. Search Kidney Insufficiency, Acute

24. Search Acute Kidney Insufficiencies

25. Search Kidney Insufficiencies, Acute

26. Search Acute Kidney Insufficiency

27. Search Kidney Failure, Acute

28. Search Acute Kidney Failures

29. Search Kidney Failures, Acute

30. Search Acute Renal Failure

31. Search Acute Renal Failures

32. Search Renal Failures, Acute

33. Search Renal Failure, Acute

34. Search Acute Kidney Failure

35. Search (((((((((((((((((((((((((#9) OR #10) OR #11) OR #12) OR #13) OR #14) OR #15) OR #16) OR #17) OR #18) OR #19) OR #20)OR #21) OR #22) OR #23) OR #24) OR #25) OR #26) OR #27) OR #28) OR #29) OR #30) OR #30) OR #31) OR #32) OR #33) OR #34

36. Search (#8) AND #35

**EMBASE**

1. exp remote ischemic preconditioning/

2. exp ischemic preconditioning/

3. exp ischemic conditioning/

4. exp contrast induced nephropathy/

5. exp acute kidney failure/

6. exp kidney injury/

7. 1 or 2 or 3

8. 4 or 5 or 6

9. 7 and 8

**CENTRAL (The Cochrane Library)**

#1 MeSH descriptor: [Ischemic Preconditioning] explode all trees

#2 Pre-Conditioning, Ischemic

#3 Preconditioning, Ischemic

#4 Ischemic Pre-Conditioning

#5 Ischemic Pre Conditioning

#6 #1 OR #2 OR #3 OR #4 OR #5

#7 MeSH descriptor: [Acute Kidney Injury] explode all trees

#8 Acute Renal Failures

#9 Acute Kidney Failures

#10 Kidney Failure, Acute

#11 Renal Failure, Acute

#12 Renal Failures, Acute

#13 Acute Kidney Failure

#14 Acute Renal Failure

#15 Kidney Failures, Acute

#16 Acute Kidney Insufficiencies

#17 Acute Renal Insufficiencies

#18 Renal Insufficiencies, Acute

#19 Kidney Insufficiencies, Acute

#20 Renal Insufficiency, Acute

#21 Acute Kidney Insufficiency

#22 Acute Renal Insufficiency

#23 Kidney Insufficiency, Acute

#24 Acute Renal Injuries

#25 Kidney Injury, Acute

#26 Renal Injury, Acute

#27 Acute Kidney Injuries

#28 Kidney Injuries, Acute

#29 Renal Injuries, Acute

#30 Acute Renal Injury

#31 contrast induced nephropathy

#32 contrast-induced nephropathy

#33 #7 OR #8 OR #9 OR #10 OR #11 OR #12 OR #13 OR #14 OR #15 OR #16 OR #17 OR #18 OR #19 OR #20 OR #21 OR #22 OR #23 OR #24 OR #25 OR #26 OR #27 OR #28 OR #29 OR #30 OR #31 OR #32

#34 #6 AND #33
